# Supplementary material for: Surface-assisted synthesis of perovskite nanosheets with bivalent aromatic cations
Source: Royal Society of Chemistry journal article supplement (doi:10.1039/d3tc04080a), 2023-12-21
Supplement: d3tc04080a1.pdf [file d3tc04080a1.pdf]

## Supporting Information

### Surface-assisted synthesis of perovskite nanosheets with bivalent aromatic cation

Andrei Mitrofanov<sup>a,b</sup>, Khrystyna Rymsha<sup>a</sup>, Dmitrii Sychev<sup>a,c</sup>, Karina Zakirova<sup>a,c</sup>, Petr Formanek<sup>a</sup>, Darius Pohl<sup>d</sup>, Eva Bittrich<sup>a</sup>, Ilka M. Hermes<sup>a</sup>, Quinn A. Besford<sup>a,\*</sup>,  
Brigitte Voit<sup>a,b,\*</sup>

<sup>a</sup>Leibniz Institut für Polymerforschung Dresden e.V., Hohe Str. 6, 01069 Dresden, Germany

<sup>b</sup>Chair of Organic Chemistry of Polymers, TUD Dresden University of Technology, 01069 Dresden, Germany

<sup>c</sup>Faculty of Chemistry and Food Chemistry, TUD Dresden University of Technology, 01062 Dresden, Germany

<sup>d</sup>Dresden Center for Nanoanalysis (DCN), Dresden, Center for Advancing Electronics Dresden (cfaed), TUD Dresden University of Technology, 01062 Dresden, Germany

\*E-mail: besford@ipfdd.de, voit@ipfdd.de

#### The preparation of reference sample.

The single crystals used as references for GIWAXS and SAED measurements were prepared according to previously published procedure.<sup>1</sup>

Briefly, a 57% w/w aqueous HI solution was diluted to 47% w/w. A 0.3 M solution of PbI<sub>2</sub> in freshly prepared HI (47%) was kept at 120 °C. At the same time, a 0.03 M solution of 1,5-naphthalenammonium iodide was prepared with stirring at 130 °C. Then 224 mL of amine precursor solution was rapidly added to the 448 μL of PbI<sub>2</sub> solution. Single crystals were obtained by slowly cooling the mixture to room temperature. The crystals were isolated, gently washed with Et<sub>2</sub>O, and dried under reduced pressure.

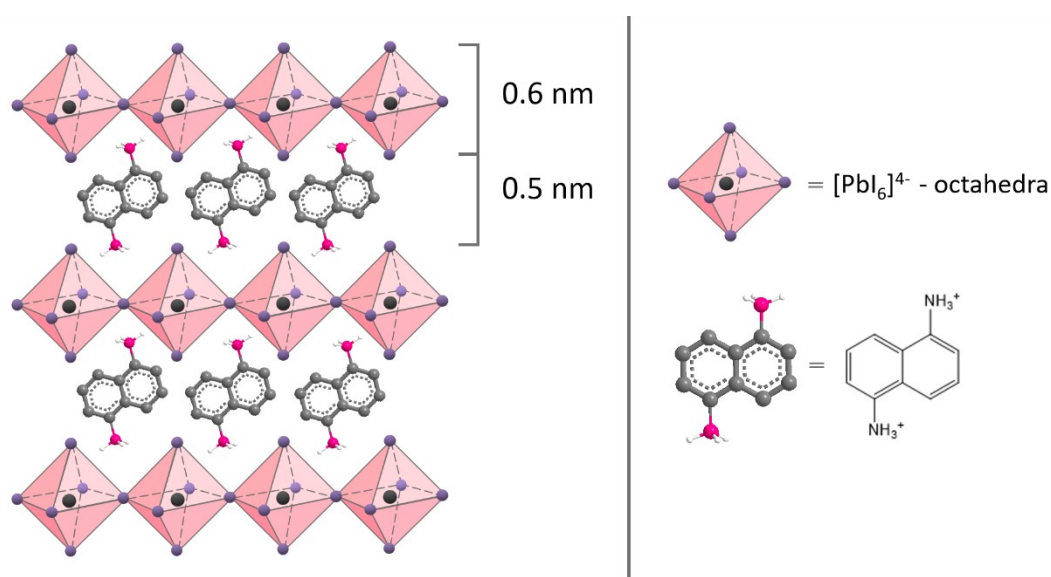

**Figure S1.** The schematic layered structure of (1,5-DAN)PbI<sub>4</sub> perovskite.

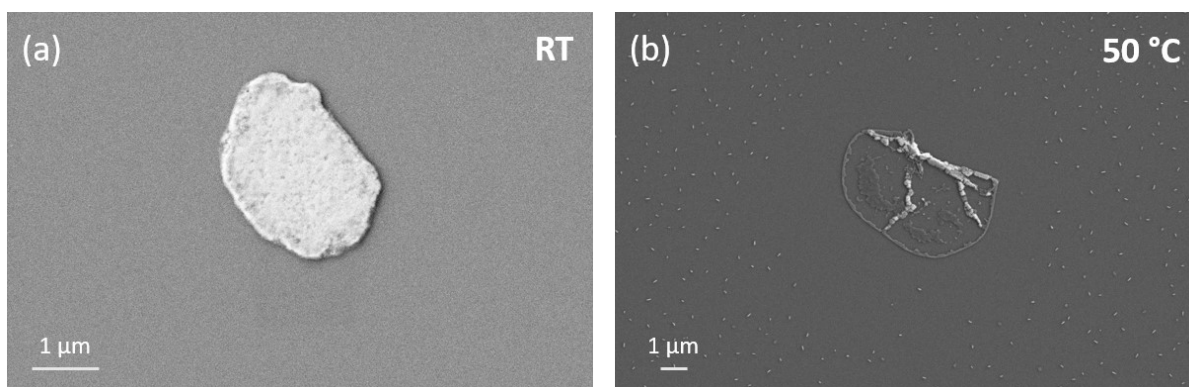

**Figure S2.** SEM images of perovskite nanosheets on Si wafer grown at room temperature (a) and at 50 °C (b) (Note: Fig. S1 is identical to Fig. 2d).

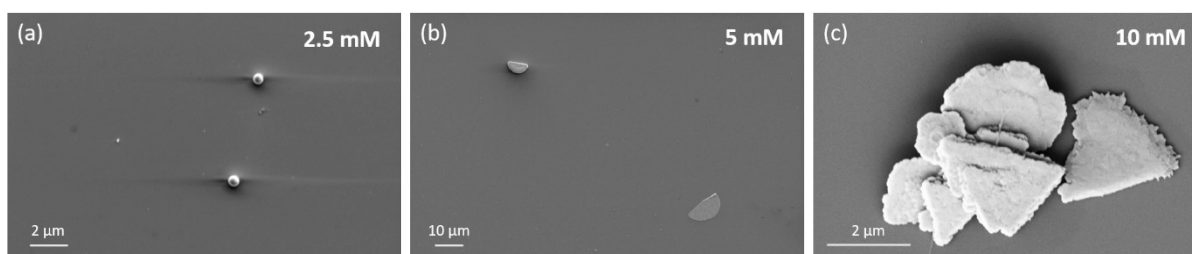

**Figure S3.** SEM images of perovskite nanosheets on Si wafer grown at room temperature from solutions of different precursor concentrations (a) 2.5 mM, (b) 5 mM, and (c) 10 mM.

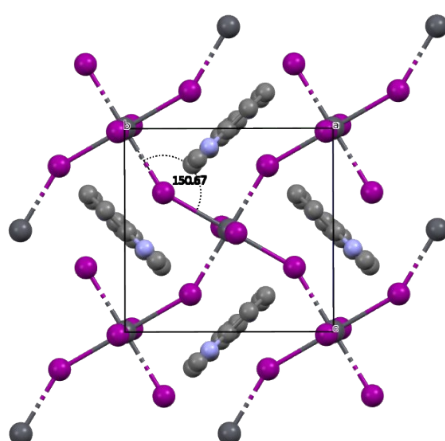

**Figure S4.** Single crystal X-ray structure of bulk (1,5-DAN)PbI<sub>4</sub> (view along a axis). The Pb-I-Pb bond angle is 150.67°, which indicates a strong distortion. For clarity, all hydrogen atoms were removed. Violet balls, iodine atoms; dark gray balls, lead atoms; light grey balls, carbon atoms; blue balls, nitrogen atoms.

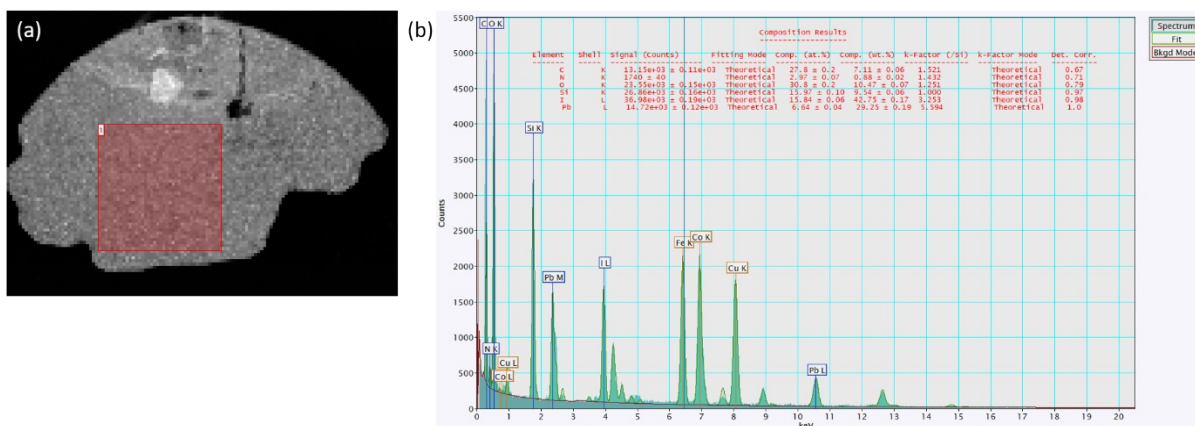

**Figure S5.** (a) STEM image of a perovskite particle grown directly on a TEM grid. (b) EDX spectrum of the area marked with red square in (a).

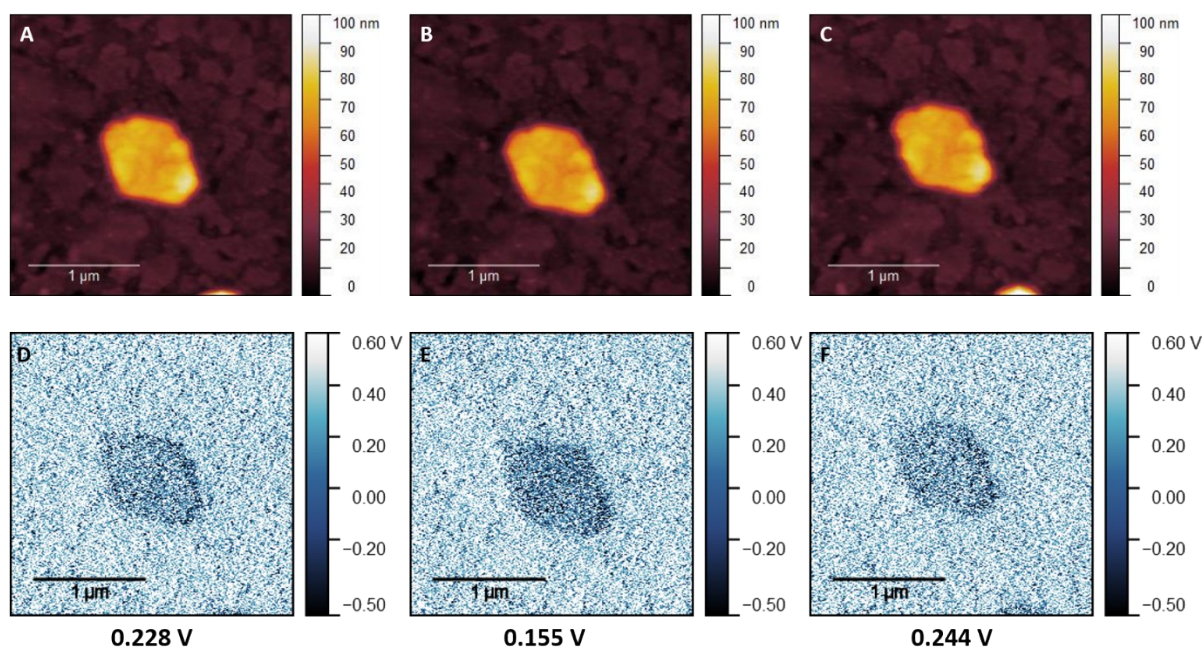

**Figure S6.** (A)-(C) represent the topography images recorded with the KPFM images of the particle prior to the illumination (A), during 405 nm illumination (B), and after the illumination (C). D-F represent the corresponding KPFM images: prior to the illumination (D), during 405 nm illumination (E), and after the illumination (F).

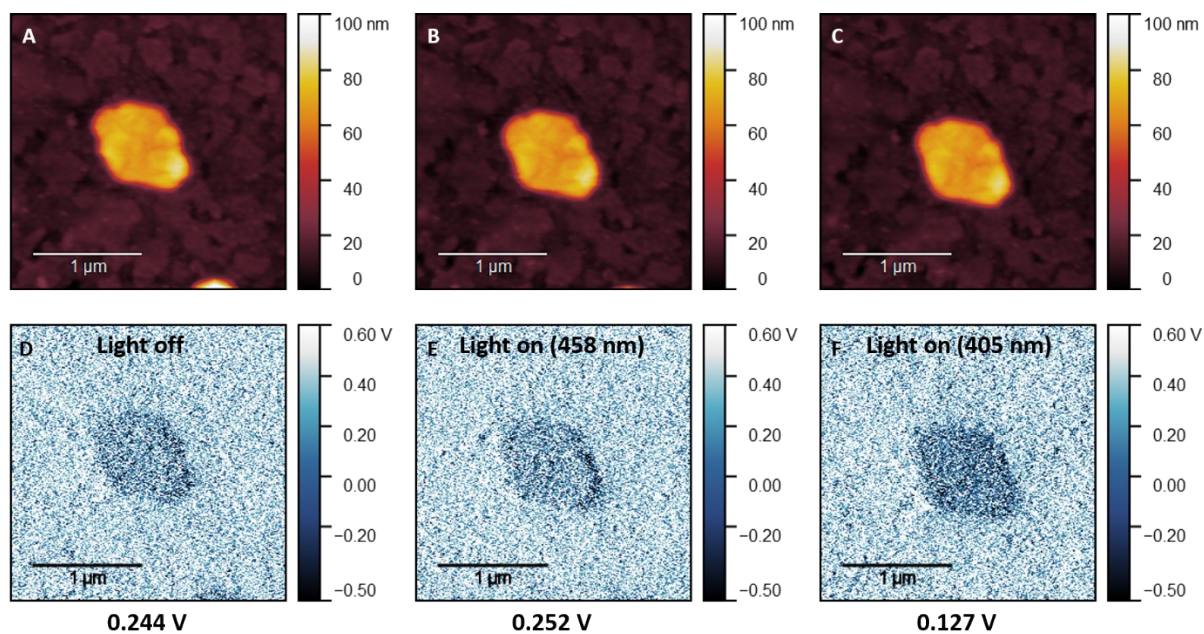

**Figure S7.** (A)-(C) represent the topography image recorded with the KPFM images prior to the illumination (A), during 458 nm illumination (B), and during 405 nm illumination (C). (D)-(F) represent the KPFM images prior to the illumination (D), during 458 nm illumination (E), and during 405 nm illumination (F).

#### References

- (1) A. Mitrofanov, Y. Berencén, E. Sadrollahi, R. Boldt, D. Bodesheim, H. Weiske, F. Paulus, J. Geck, G. Cuniberti, A. Kuc and B. Voit, *J. Mater. Chem. C*, 2023, **11**, 5024–5031.
